# Supplementary material
Source: PubMed Central journal article supplement (PMC6361688)

456 Supplementary Figure 1: Participant flow diagram

457

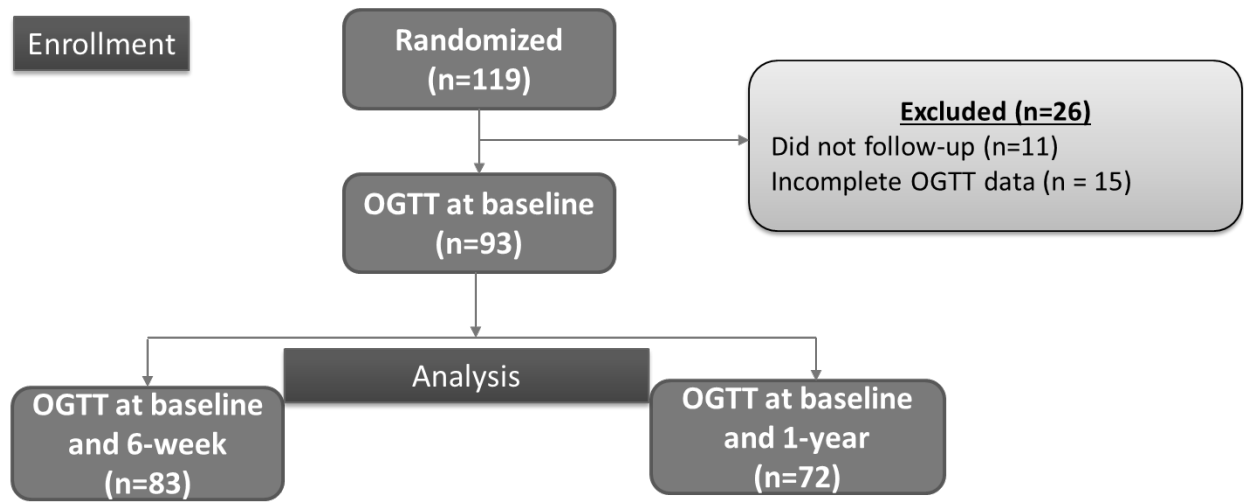

458

Supplement: NIHMS1515733-supplement-1.pdf [file NIHMS1515733-supplement-1.pdf]
